# Supplementary material for: A Comparison of Flavorless Electronic Cigarette-Generated Aerosol and Conventional Cigarette Smoke on the Planktonic Growth of Common Oral Commensal Streptococci
Source: PubMed Central journal article supplement (PMC6949915; doi:10.3390/ijerph16245004), 2019-12-09
Supplement: ijerph-16-05004-s001.pdf [file ijerph-16-05004-s001.pdf]

## Base Line Absorbance

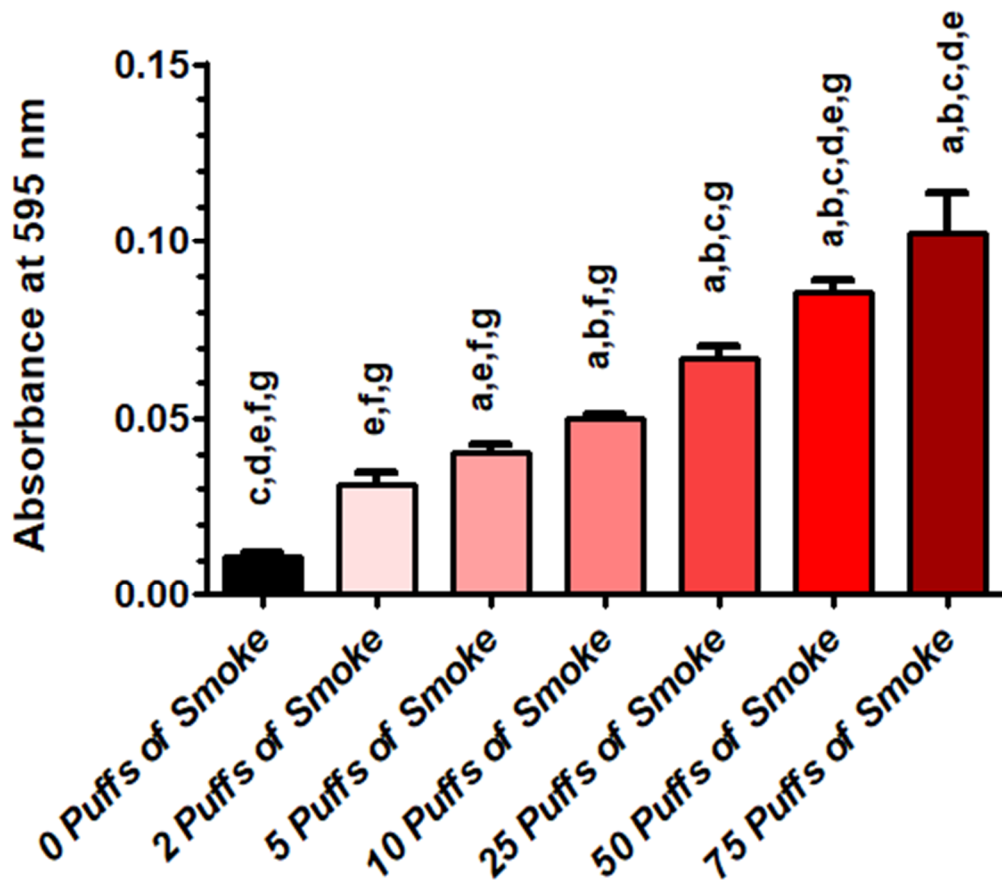

**Figure S1.** Base Line Absorbance Following Exposure to Smoke. Effects of 0, 2, 5, 10, 25, 50 and 75 puffs smoke on baseline absorbance readings. a = significance from 0 puffs, b = significance from 2 puffs, c = significance from 5 puffs, d = significance from 10 puffs, e = significance from 25 puffs, f = significance from 50 puffs and g = significance from 75 puffs where each bar represents mean  $\pm$  SEM ( $n = 3$ ) and  $p < 0.01 =$  significance.
